# Supplementary material for: Multi-omic profiling reveals the ataxia protein sacsin is required for integrin trafficking and synaptic organization
Source: PubMed Central journal article supplement — Cell Rep. 2022 Nov 1;41(5):111580. doi: 10.1016/j.celrep.2022.111580 (PMC9647044; doi:10.1016/j.celrep.2022.111580), 2022-11-01
Supplement: mmc1.pdf [file mmc1.pdf]

**Supplemental information**

**Multi-omic profiling reveals the ataxia protein  
sacsin is required for integrin trafficking  
and synaptic organization**

**Lisa E.L. Romano, Wen Yih Aw, Kathryn M. Hixson, Tatiana V. Novoselova, Tammy M. Havener, Stefanie Howell, Bonnie Taylor-Blake, Charlotte L. Hall, Lei Xing, Josh Beri, Suran Nethisinghe, Laura Perna, Abubakar Hatimy, Ginevra Chioccioli Altadonna, Lee M. Graves, Laura E. Herring, Anthony J. Hickey, Konstantinos Thalassinou, J. Paul Chapple, and Justin M. Wolter**

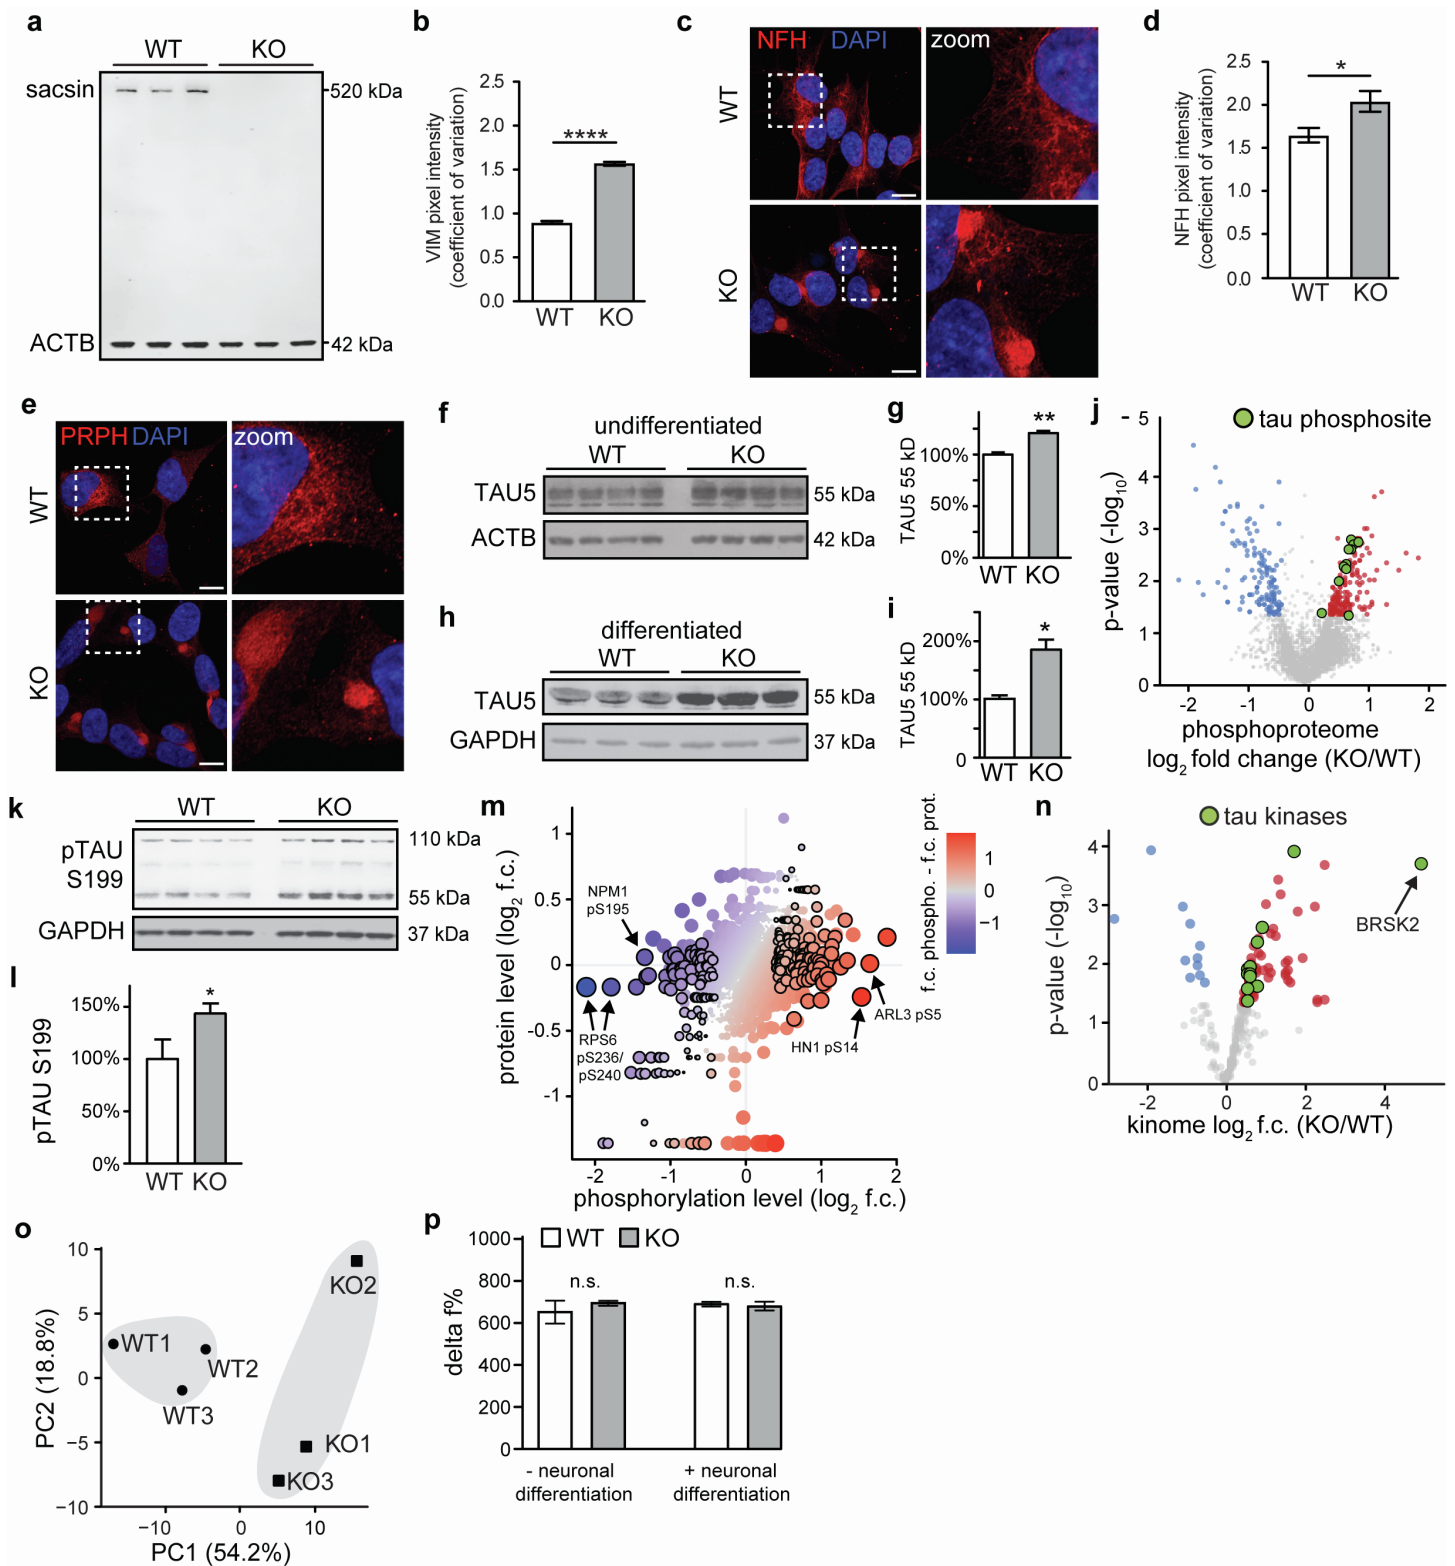

**Extended Data Figure 1 – saccsin KO SH-SY5Y cells recapitulate cellular phenotypes consistent with known deficits**

- Western blot for saccsin and ACTB demonstrating the loss of saccsin in SH-SY5Y KO cells.
- Coefficient of variation of vimentin pixel intensity values across the cell, with lower values indicating uniform distribution and higher values indicating polarized distribution.  $n = 3$ , S.E.M., Student's t-test, \*\*\*\* $p < 0.0001$ .
- Representative confocal images of WT and saccsin KO cells immunostained for the neurofilament heavy chain.

- d. Coefficient of variation of NFH pixel intensity. n = 3, S.E.M., Student's t-test, \*p<0.05.
- e. Representative confocal images of WT and sacsins KO cells immunostained for peripherin, an intermediate filament protein found in neurons in the peripheral nervous system.
- f-i. Western blot analysis quantification of pan-tau (Tau5) in sacsins KO and WT cells in undifferentiated (f,g) and neuronally differentiated (h,i) SH-SY5Y cells. n = 3-4, S.E.M., Student's t-test, \*p<0.05, \*\*p<0.01.
- j. Phosphoproteomic analysis of sacsins KO cells. Green circles mark specific phosphorylated residues on tau.
- k,l. Western blot and quantification of phosphorylated tau at serine 199. n = 3, S.E.M., Student's t-test, \*p<0.05.
- m. Phosphopeptide levels compared to changes in total protein levels. Color scale reflects the difference in log<sub>2</sub> f.c. between each dataset. Black outline marks phosphosites with p<0.05 and log<sub>2</sub> f.c. -/+0.4.
- n. Kinome profiling of sacsins KO cells. Green circles mark kinases which are known to directly phosphorylate tau.
- o. Principle component analysis of all kinases identified in kinome profiling data (Supp. Table 1). Unsupervised hierarchical clustering separated WT and KO cells (grey shading), suggesting widespread changes in the kinome of sacsins KO cells.
- p. Biochemical analysis of tau aggregation using homogeneous time resolved fluorescence (HTRF) and anti-Tau antibodies conjugated with either Tb (donor) or d2 (acceptor) fluorophores. Graph represents the HTRF ratio, or Delta f%, of the two emission signals comparing WT/KO SH-SHY5Y lysates. n = 3, S.E.M., Student's t-test, n.s. = not significant.

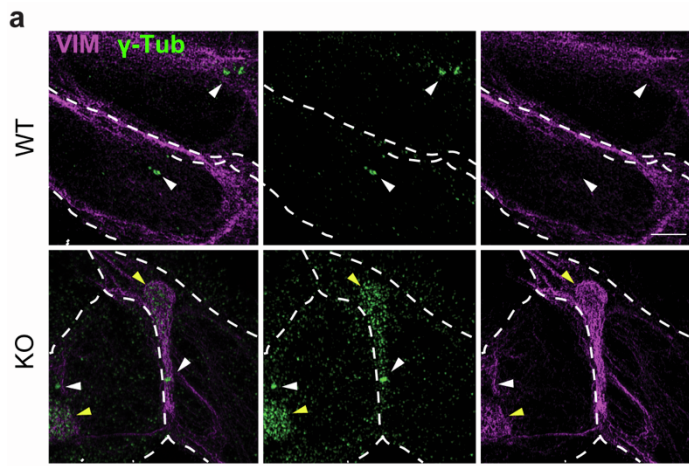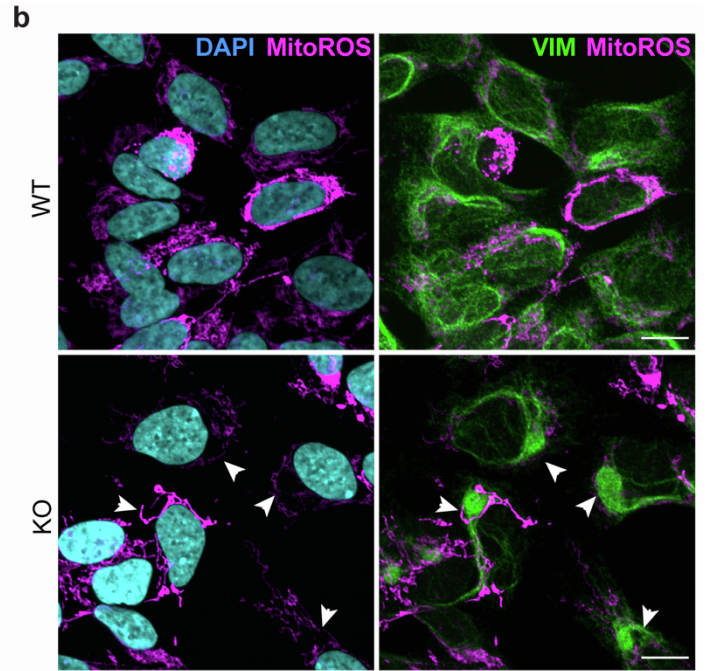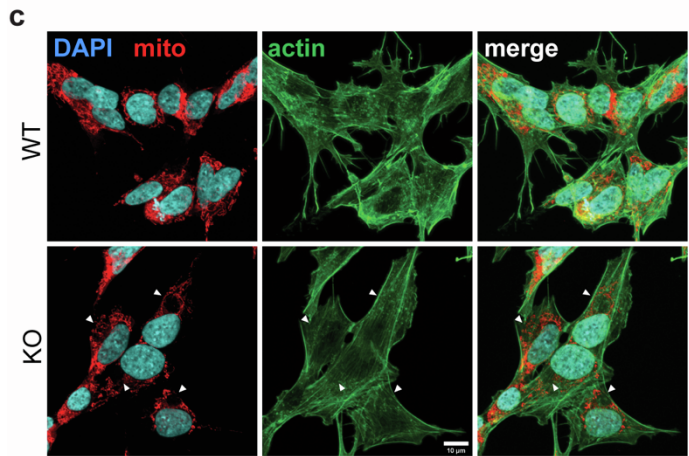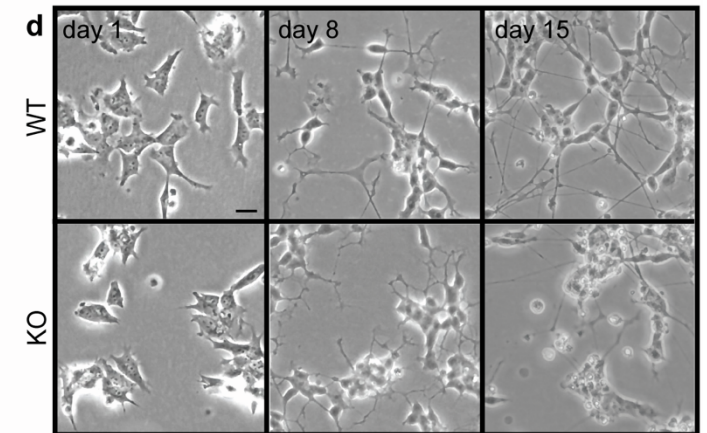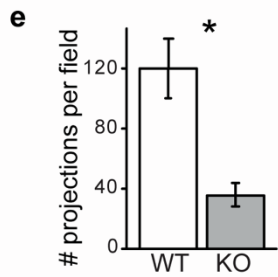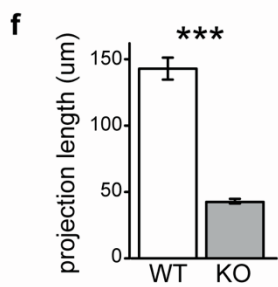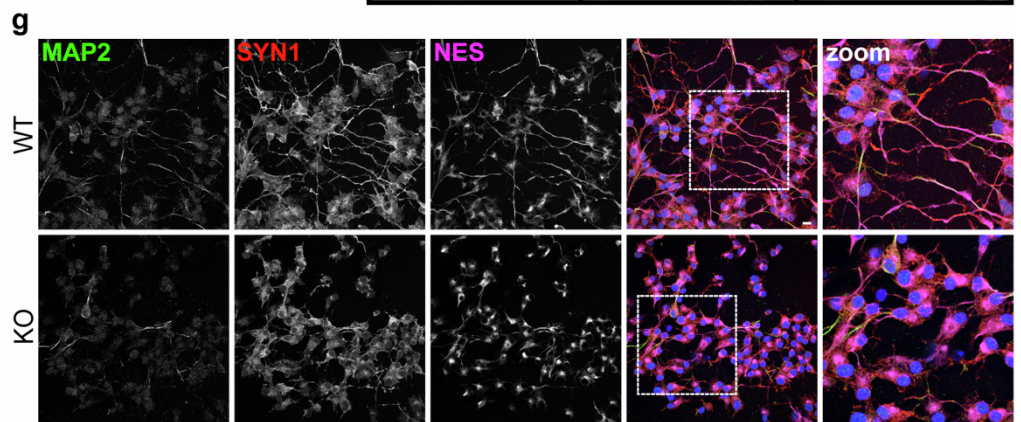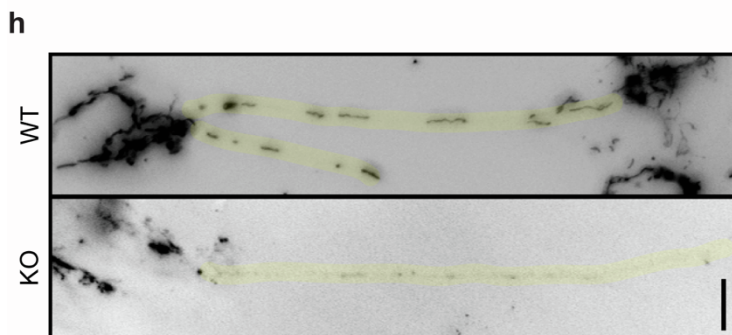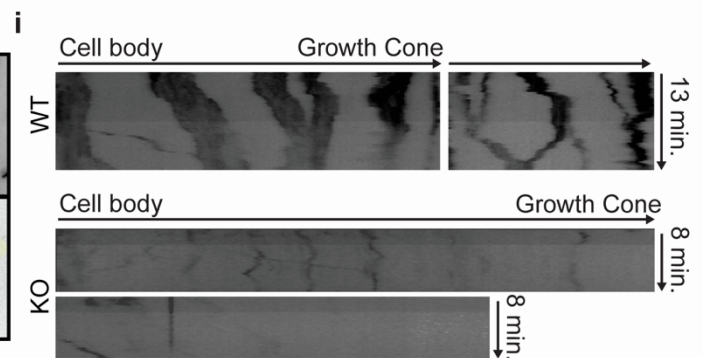

## **Extended Data Figure 2 – Microtubule and mitochondria deficits in sacsins KO cells**

- a. Super resolution structural illumination microscopy images showing accumulation of gamma-tubulin within perinuclear vimentin bundles of sacsins KO cells. White arrows point to centrioles, yellow arrowheads highlight the presence of gamma-tubulin within vimentin bundles in KO cells. Dashed white lines denote boundaries between adjacent cells. Scale bar = 1  $\mu$ m.
- b. Representative confocal images of WT and sacsins KO cells stained for the mitochondria membrane potential dependent dye CMXRos, vimentin, and nuclei (DAPI). Arrowheads highlight the exclusion of mitochondria from vimentin bundles.
- c. Representative confocal images of WT and sacsins KO cells immunostained for mitotracker, actin, and nuclei (DAPI). Arrowheads highlight the exclusion of mitochondria from vimentin bundles.
- d. Representative phase contrast brightfield images of WT and sacsins KO cells across 15 days of neuronal differentiation.
- e,f. Quantitation of the number of projections per field (e) and length of projection (f) of WT/KO cells demonstrating significantly reduced number and length of projections in sacsins KO cells.  $n = 3$ , S.E.M., Student's t-test, \* $p < 0.05$ , \*\*\* $p < 0.001$ .
- g. Confocal images of WT/KO cells after 15 days in differentiation conditions, stained for neuronal markers microtubule associated protein 2 (MAP2) and synapsin1 (SYN1), and the intermediate filament protein nestin (NES), a marker of immature neurons. Scale bar = 10  $\mu$ m.
- h. Mitochondria labeled with mitoTracker GreenFM in neurites (highlighted in yellow) of 15 day differentiated WT/KO cells demonstrating the lack of elongated mitochondria in sacsins KO neurites. Images were snapshots from live-cell time-lapse imaging.
- i. Kymograph illustrating mitochondrial transport along neurites of differentiated WT/KO cells. Note that mitochondrial undergo both retrograde and anterograde movement in control but are relatively static in sacsins KO cells. Scale bar = 10  $\mu$ m.

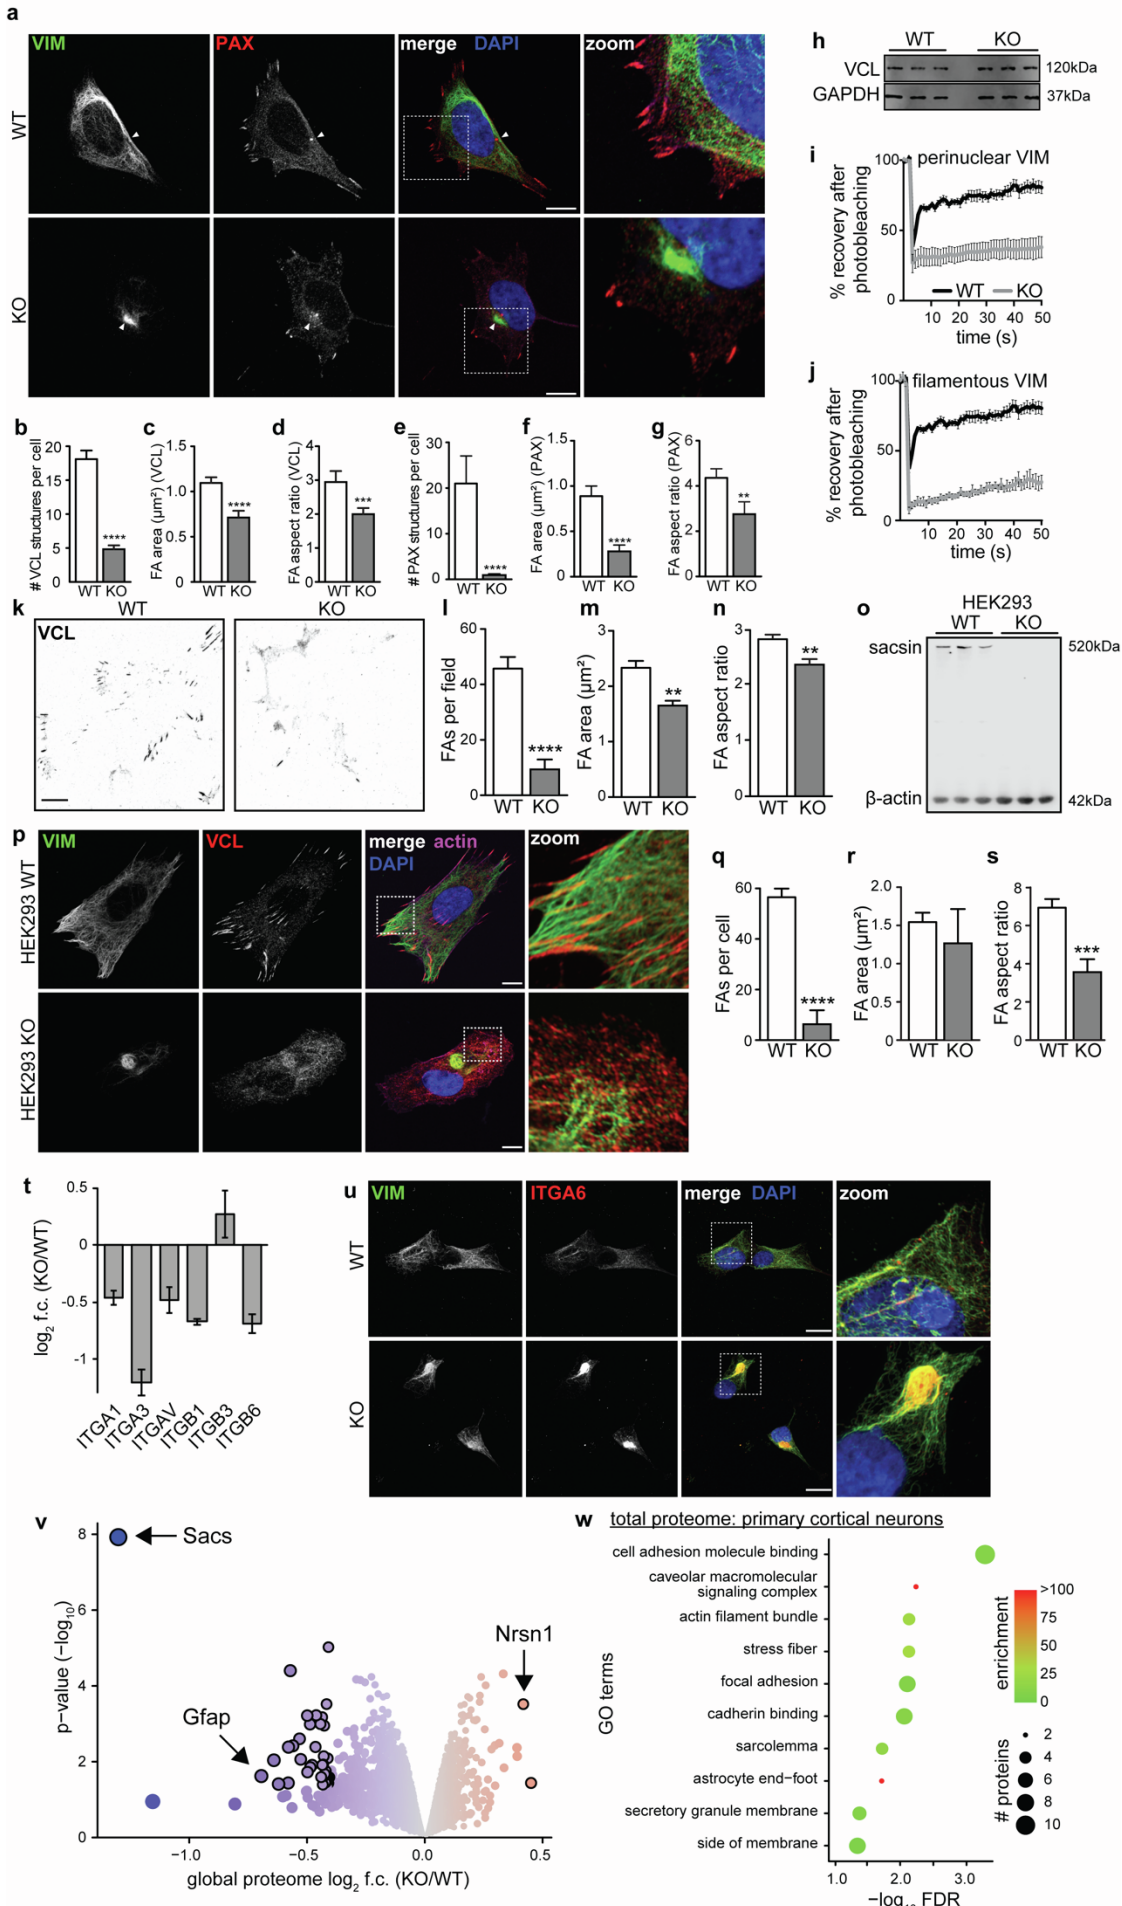

### **Extended Data Figure 3 – FAs are disrupted in sacs in KO cells**

- a. Representative confocal image of WT/KO cells labelled with vimentin and paxillin. Arrowhead marks the PAX positive MTOC, which is sequestered in the vimentin bundle in SACS KO cells. Scale bar = 10  $\mu$ m.
- b-g. Quantification of images from Fig. 3c (b-d), and Extended Data Figure 3a (e-g). Aspect ratio = width:height ratio. n = 3 independent cultures, S.E.M., Student's t-test, \*\*p<0.01, \*\*\*p<0.001, \*\*\*\*p<0.0001.
- h. Western blot for vinculin, showing that levels of the FA protein are unaltered in KO cells.
- i,j. FRAP analysis of perinuclear vimentin (i), and filamentous vimentin on the periphery of the cell away from vimentin bundle (j). Cells were transfected with EGFP-VIM expression vector and defined 2 $\times$ 2  $\mu$ m regions of interest were bleached with a 488-nm laser. Recovery was monitored over 50 cycles of imaging with a 1-s interval. n=10 cells from each of three independent experiments.
- f. Representative image of cover slips treated with hypotonic shock to remove cell bodies, leaving FAs retained through ECM interaction. Staining for the FA protein vinculin. Scale bar = 10  $\mu$ m.
- l-n. Quantification of the incidence, area, and aspect ratio of paxillin positive FAs in WT/KO cells treated with hypotonic shock. n = 3 independent cultures, S.E.M., Student's t-test, \*\*p<0.01, \*\*\*\*p<0.0001.
- o. Western blot for sacs in and ACTB demonstrating the loss of sacs in HEK293 KO cells.
- p. Confocal images of HEK293 cells immunolabeled for vimentin, vinculin, and actin. Scale bar = 10  $\mu$ m.
- q-s. Quantification of images from Supp. Fig. 3p, suggesting FA deficits are consistent with SH-SY5Y cells. n = 3 independent cultures, S.E.M., Student's t-test, \*\*\*p<0.001, \*\*\*\*p<0.0001.
- t. Changes in levels of integrin proteins quantified by mass-spectrometry (data from Supplementary Table 1, Fig. 1b). n = 3, S.E.M.
- u. Representative confocal images of cells immunolabeled for ITGA6. Scale bar = 10  $\mu$ m.
- v. Global proteomic profiling of primary cortical cultures derived from E15.5 *Sacs*<sup>(-/-)</sup> mice. Cutoffs for significance were p<0.05 and log<sub>2</sub> fold change (f.c.) -/+0.4, denoted by black outline. n=3 litters, replicate defined as litter mate control cultures from *Sacs*<sup>(+/+)</sup> and *Sacs*<sup>(-/-)</sup> mice.
- w. GO term analysis of differentially expressed proteins in primary cortical cultures (p<0.05, log<sub>2</sub> f.c. cutoff -/+0.4).

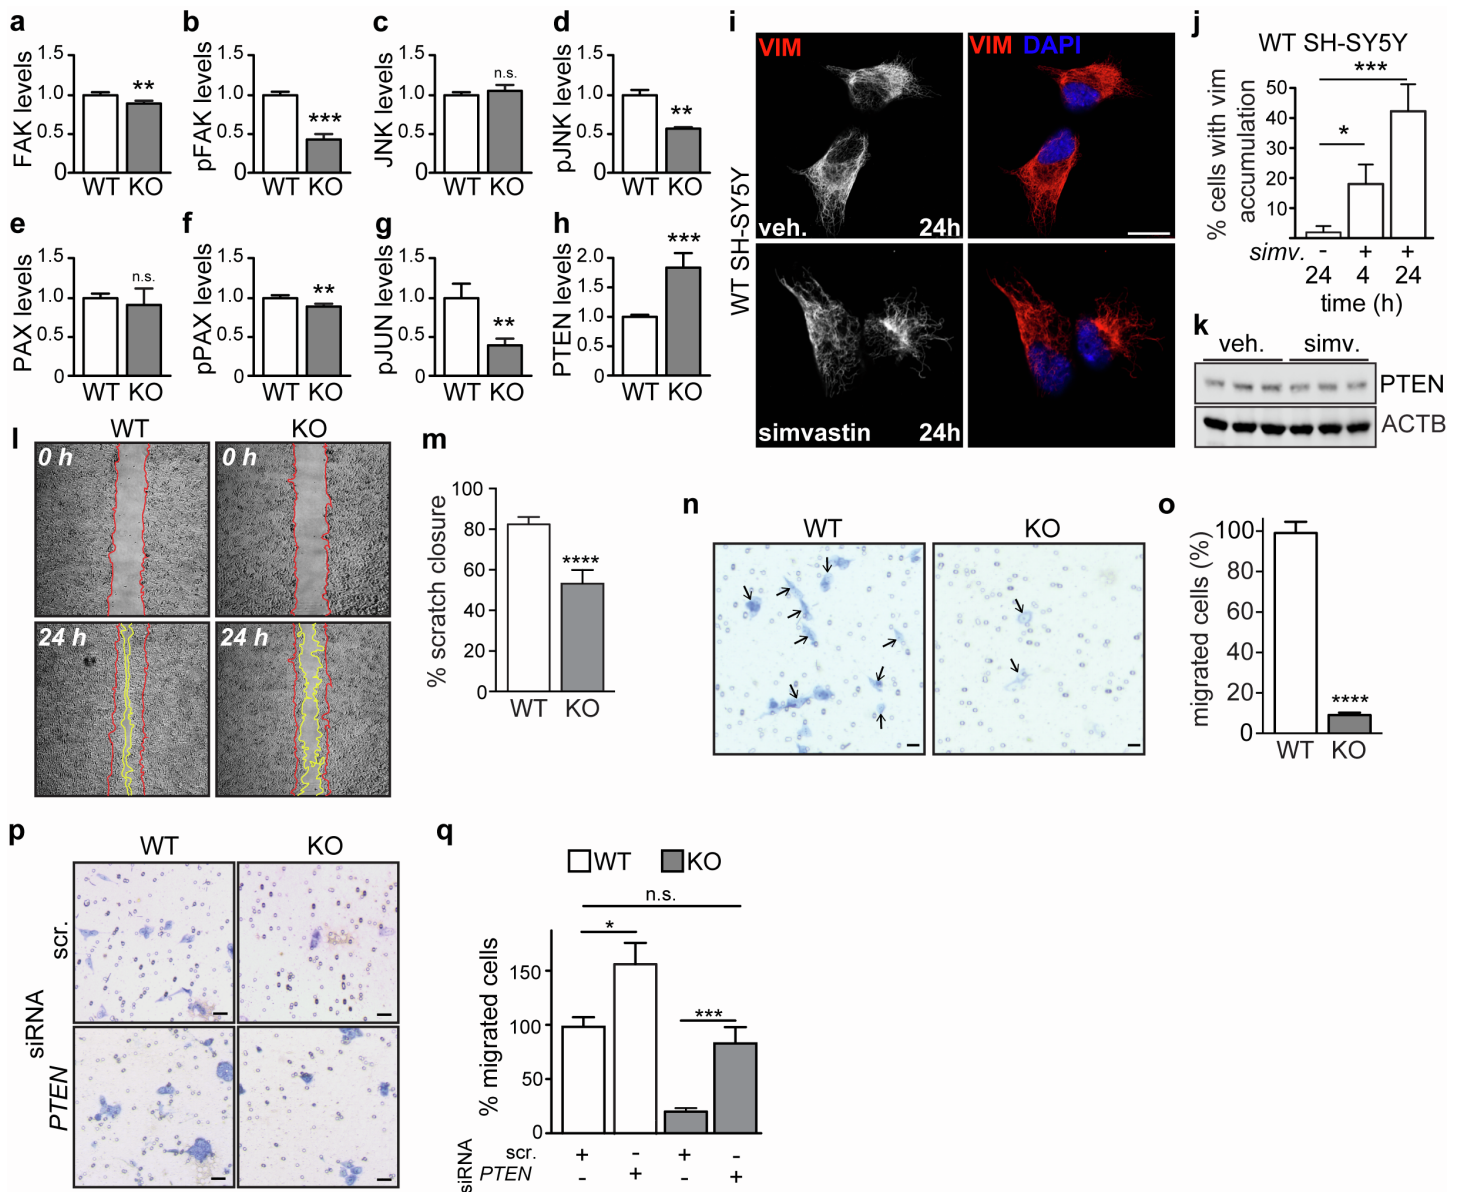

#### Extended Data Figure 4 – Modulating *PTEN* rescues cellular phenotypes in sacsinn KO cells

- a-h. Quantification of immunoblots from Fig. 4c. Intensity normalized to ACTB. n=3 biological replicates, S.E.M., Student's t-test, \*\*p<0.01, \*\*\*p<0.001.
- i. Representative confocal images of the induction of vimentin bundling by simvastatin. Scale bars = 10  $\mu$ m.
- j. Quantification of vimentin bundling phenotype induced by simvastatin over time.
- k. Western blot of PTEN levels in 24-hour simvastatin treated WT cells, suggesting that vimentin bundling does not affect PTEN levels.
- l,m. Representative bright field images of a scratch assay of WT/KO SH-SY5Y cells. Red and yellow lines mark the edge of the wound after 0 and 24 hours of recovery, respectively (l). Quantification of scratch closure in WT/KO 24 hours after the scratch was made. n = 3 independent cultures, S.E.M., Student's t-test, \*\*\*\*p<0.0001.
- n. Representative images of WT/KO SH-SY5Y cells in Transwell chambers with 8  $\mu$ m pores 24 hours after plating, fixed and stained with Giemsa blue. Arrows mark cell bodies, scale bar = 20  $\mu$ m.
- o. Quantification of the number of migrated cells after 24 hours, normalized to WT. n = 3 biological replicates, S.E.M., Student's t-test, \*\*\*\*p<0.0001.
- p. Representative images of WT/KO SH-SY5Y cells transfected with the indicated siRNAs, and plated in Transwell chambers. Scale bar = 20  $\mu$ m.
- q. Quantification of Transwell assay 24 hours after plating. n = 5 per cell line/condition, S.E.M., Student's t-test, \*p<0.05, \*\*\*p<0.001.



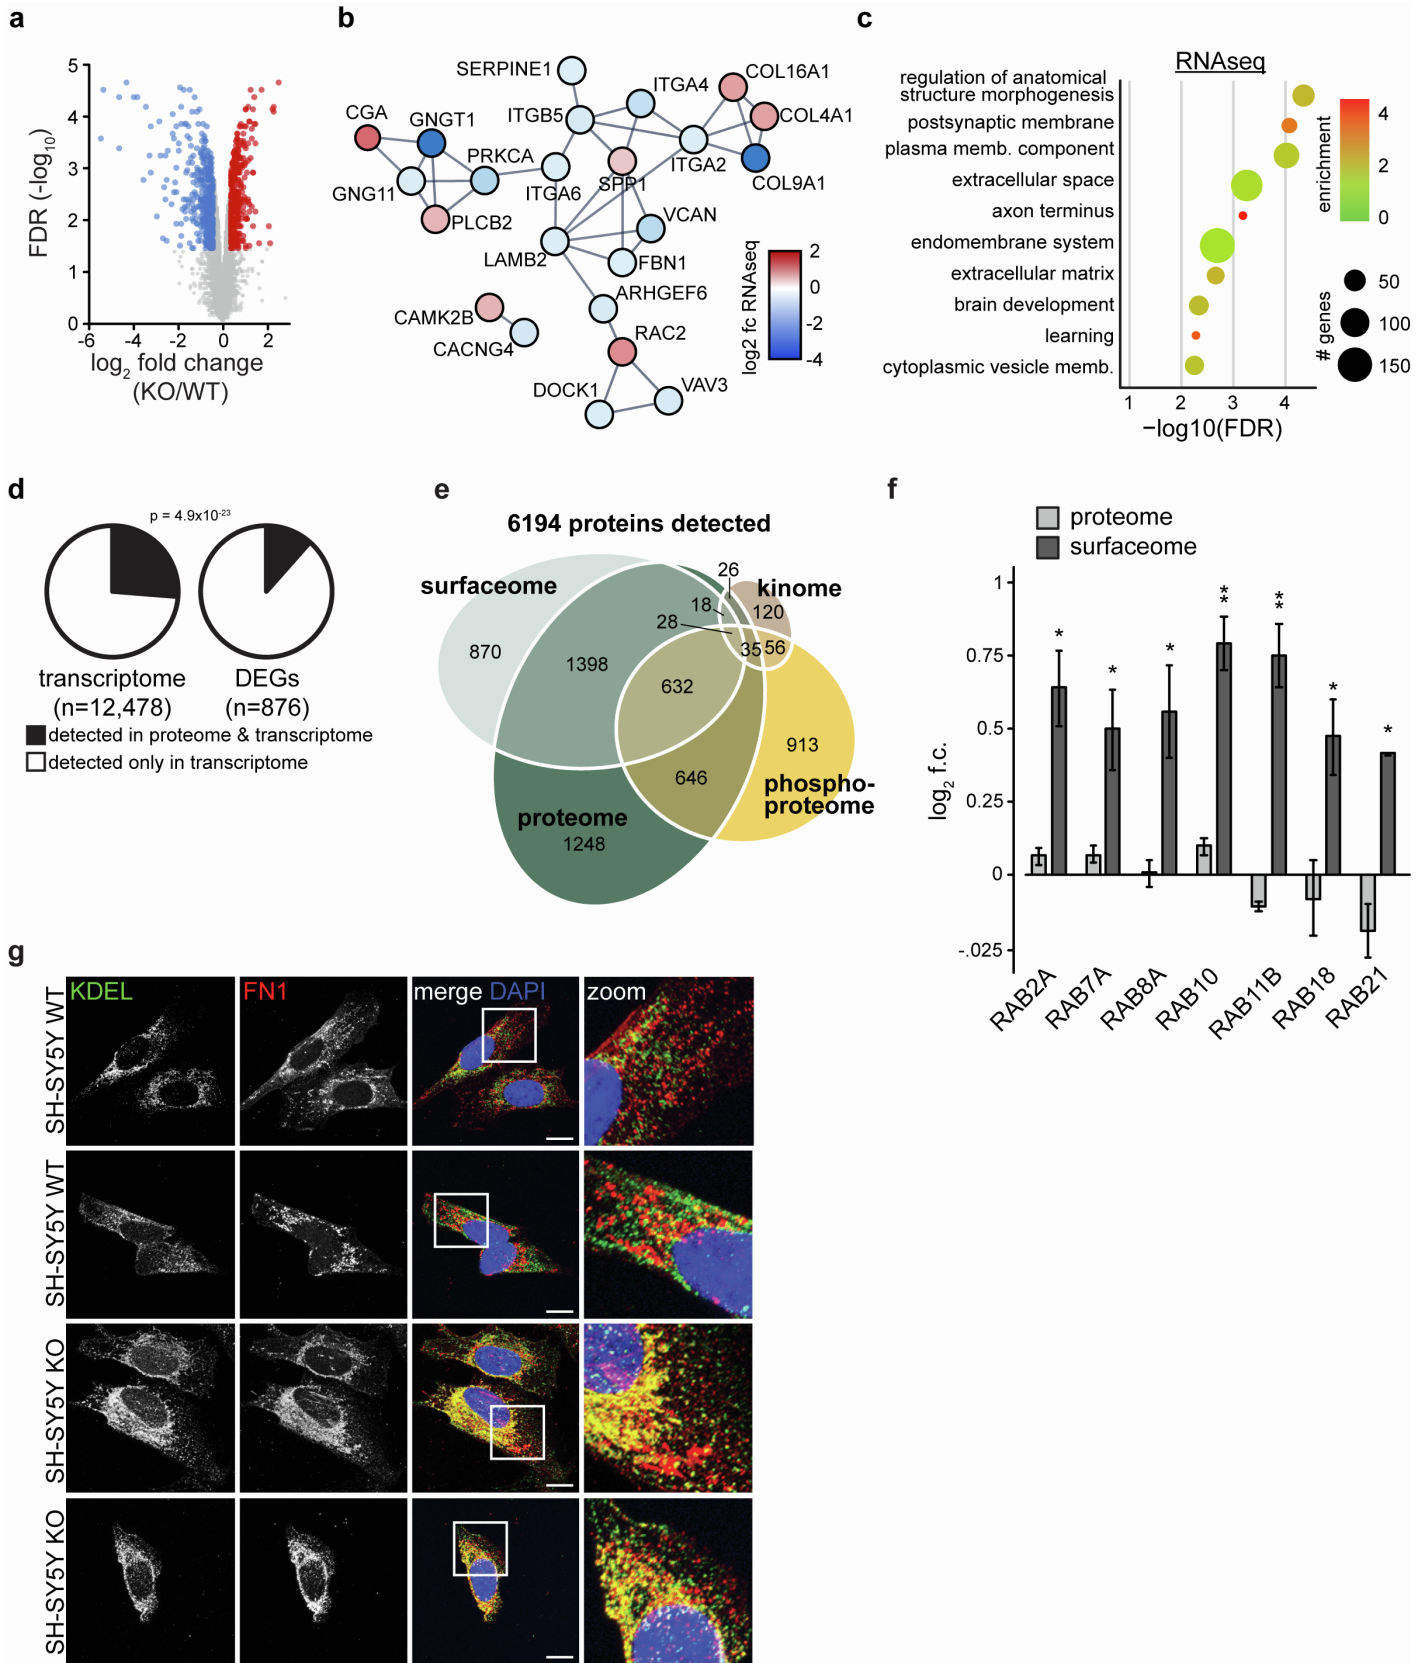

### Extended Data Figure 5 – Altered transcription of synaptic adhesion and vesicular proteins

- RNA-seq of 15 day neuronally differentiated SH-SY5Y cells.
- Interaction network of cell adhesion proteins that are differentially expressed.
- GO term analysis of differentially expressed genes suggests that synaptic and vesicular transport genes are altered in neurons ( $p < 0.05$ ,  $\log_2$  f.c.  $\pm 0.5$ ).

- d. Overlapping gene/protein identification from RNAseq and proteomics, showing that DEGs were not detected as readily in proteomics, as proteins that were not differentially expressed at the RNA level. Statistics: Hypergeometric test.
- e. Euler diagram of protein identification across all mass-spec datasets.
- f.  $\text{Log}_2$  f.c. of Rab proteins in proteome and surfaceome datasets. Asterisks refer to statistical significance in each dataset. No Rabs were significantly affected in the proteome.  $n = 3$ , S.E.M., Student's t-test, \* $p < 0.05$ , \*\* $p < 0.01$ .
- g. Representative confocal images of cells immunolabelled for fibronectin and KDEL in in WT/KO SH-SY5Y cells. Scale bar = 10  $\mu\text{m}$ .

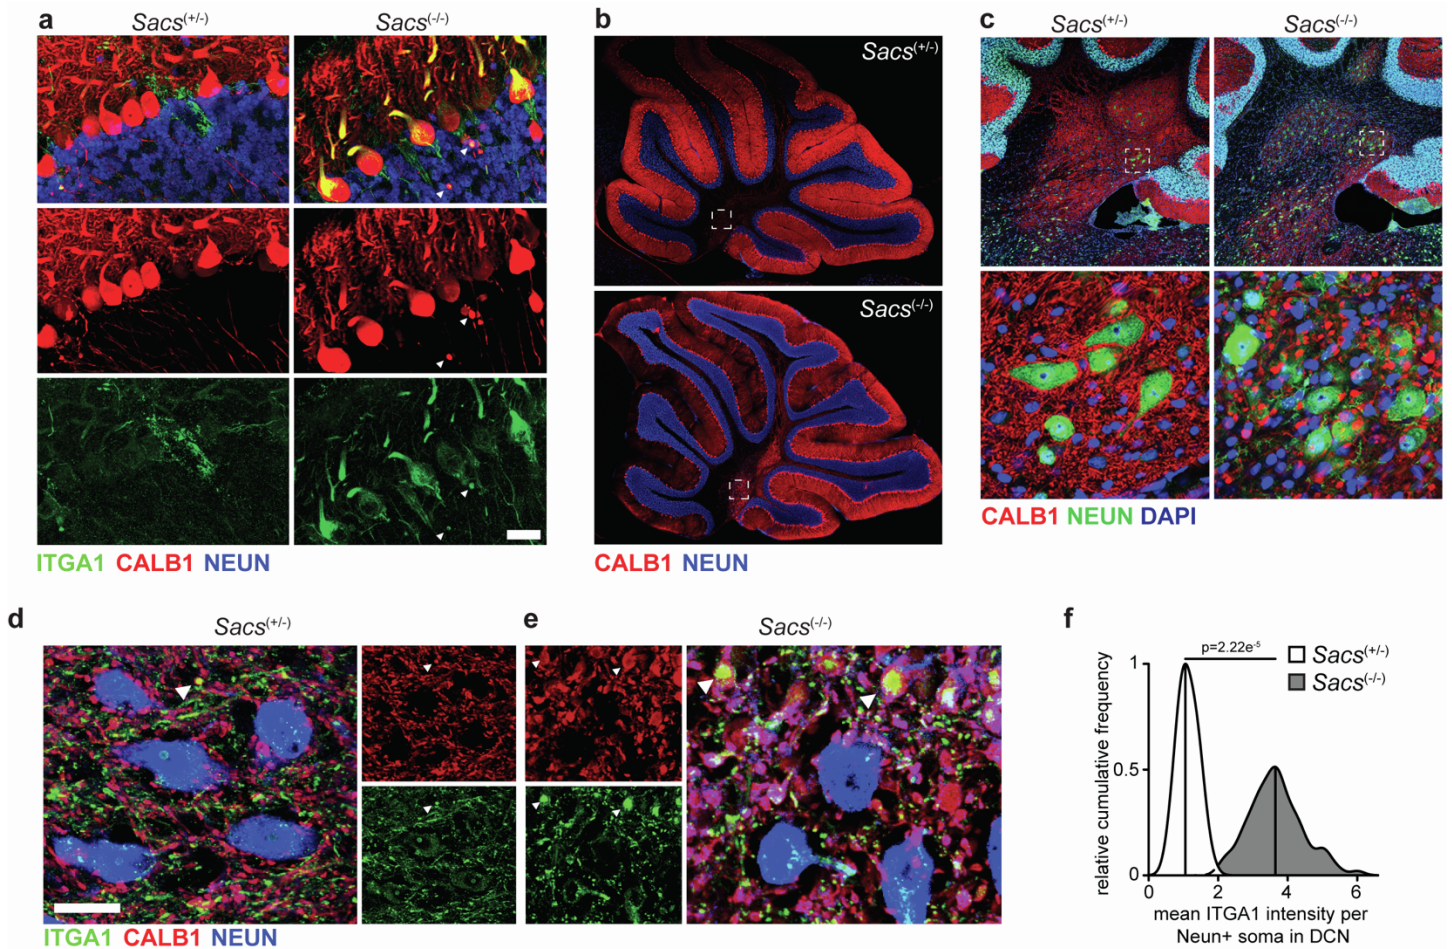

### Extended Data Figure 6 – Cerebellar imaging in SACS KO mice

- Purkinje cell layer in P120 mice. Arrowhead marks ITGA1 accumulation in axonal swellings. Scale bar = 20  $\mu$ m.
- Sagittal cerebellar section, marking the general DCN region analyzed in Figs. 6h-l, S6c-f.
- DCN in P120 mice, demonstrating substantial disruption of Purkinje neuron termini on DCN neurons. Scale bar = 20  $\mu$ m.
- e. DCN in P60 mice. Arrowheads mark large CALB1+ structures, with accumulation of ITGA1. Scale bar = 20  $\mu$ m.
- Quantification of images in Fig. 6k. Large diameter DCN neuron soma defined as NEUN+/DAPI+ where diameter is between 20-25  $\mu$ m. Replicates defined as in Fig. 6d, n=4, paired t-test.

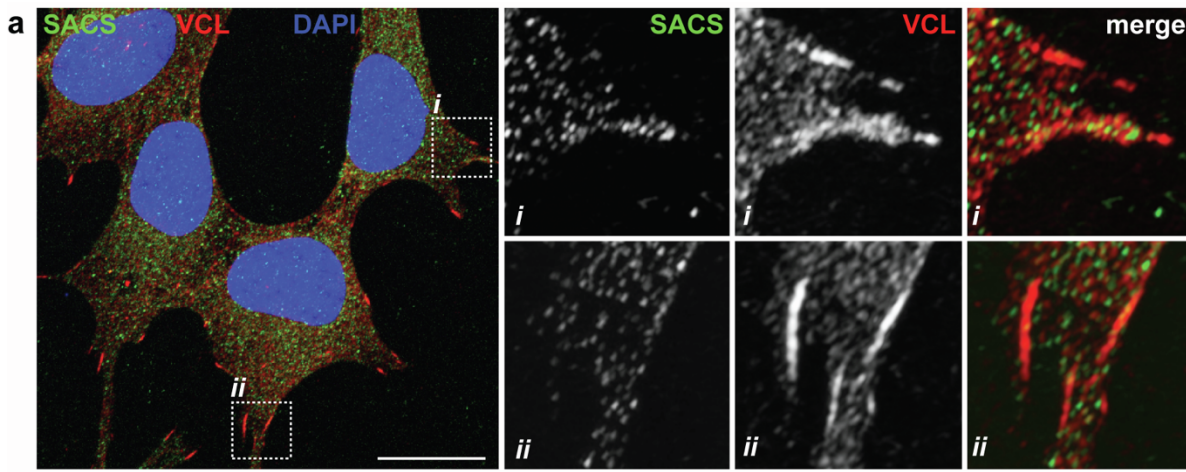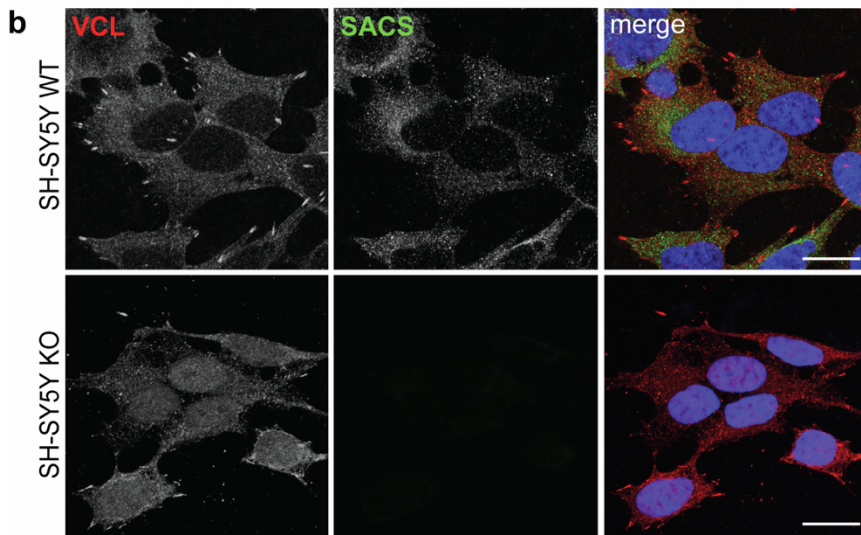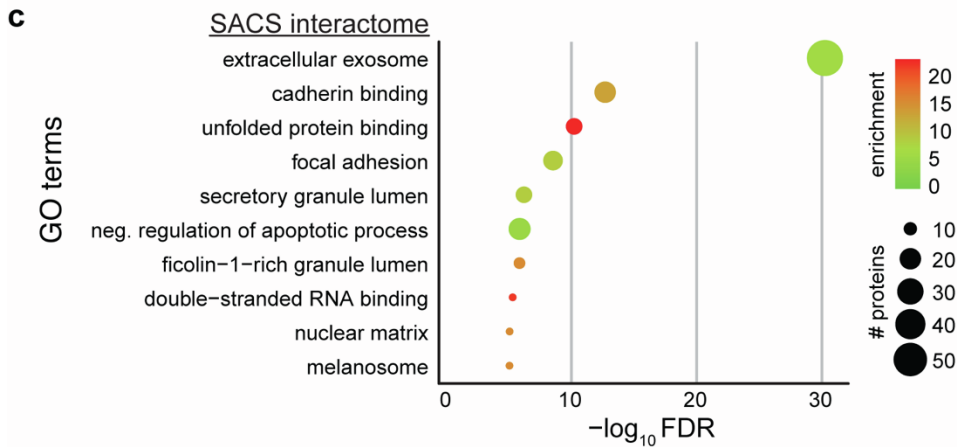

### **Extended Data Figure 7 – saccin interactors**

- Representative confocal image for saccin and vinculin in WT SH-SY5Y cells demonstrating saccin colocalizes with FAs.
- Representative confocal image for saccin KO cells processed in parallel to (a), demonstrating the specificity of saccin staining.
- GO term analysis of all proteins identified in the saccin co-IP interactome (Supplementary Table 4).
